# Supplementary material for: Highly efficient functionalized MOF-LIC-1 for extraction of U(vi) and Th(iv) from aqueous solution: experimental and theoretical studies
Source: Royal Society of Chemistry journal article supplement (doi:10.1039/d1dt03317d), 2022-01-01
Supplement: d1dt03317d1.pdf [file d1dt03317d1.pdf]

# Highly efficient functionalized MOF-LIC-1 for Extraction of U(VI) and Th(IV) from Aqueous Solution: Experimental and Theoretical Studies

*V. Venkata Sravani,<sup>1,2</sup> Somnath Sengupta,<sup>2</sup> B. Sreenivasulu,<sup>2,\*</sup> Gopinadhanpillai  
Gopakumar,<sup>2</sup> Sarita Tripathi,<sup>1</sup> Manish Chandra,<sup>2</sup> C. V. S. Brahmmananda Rao,<sup>1,2</sup> A.  
Suresh,<sup>1,2,\*</sup> and Sivaraman Nagarajan<sup>1,2</sup>*

<sup>1</sup> Homi Bhabha National Institute, Indira Gandhi Centre for Atomic Research, Kalpakkam – 603 102, Tamil Nadu, India.

<sup>2</sup> Material Chemistry and Metal Fuel Cycle Group, Indira Gandhi Centre for Atomic Research, Kalpakkam– 603 102, Tamil Nadu, India.

---

Corresponding authors:

Dr. A. Suresh and Dr. B. Sreenivasulu,  
Fuel Chemistry Division,  
Materials Chemistry and Metal Fuel Cycle Group,  
Indira Gandhi Centre for Atomic Research,  
Kalpakkam – 603102,  
Tamil Nadu, India.  
Tel. +91 44 27480065 – 24028  
Email: [asu@igcar.gov.in](mailto:asu@igcar.gov.in) and [bsrinu@igcar.gov.in](mailto:bsrinu@igcar.gov.in)

## Table of Contents

| Figure and Tables                                                           | Page No |
|-----------------------------------------------------------------------------|---------|
| IR spectra of MOF-LIC-1MOFs                                                 | 3       |
| Powder XRD patterns of MOF-LIC-1MOFs                                        | 3       |
| TGA plots of MOF-LIC-1 MOFs                                                 | 4       |
| SEM & EDX spectra of MOF-LIC-1MOFs                                          | 5-7     |
| Chemical stability of MOF-LIC-1 MOFs                                        | 8       |
| Kinetic studies for U(VI)/Th(IV) sorption onto MOF-LIC-1MOFs                | 9-10    |
| Pseudo-second order fitting of MOF-LIC-1MOFs for U(VI) & Th(IV)             | 11-12   |
| Table S1: Kinetic parameters for U(VI)/Th(IV) sorption onto MOF-LIC-1 MOFs: | 13      |
| Table S2: Leaching studies of U(VI) sorbed on MOF-LIC-1 MOFs                | 14      |
| Table S3: Leaching studies of Th(IV) sorbed on MOF-LIC-1MOFs                | 14      |
| FTIR spectra irradiated MOFs                                                | 15      |
| Sorption studies of U(VI) / Th(IV) using irradiated MOFs                    | 15      |
| Cartesian coordinates of optimized MOFs ligands                             | 16-19   |
| Cartesian coordinates of uranyl bind with ligands                           | 20-33   |

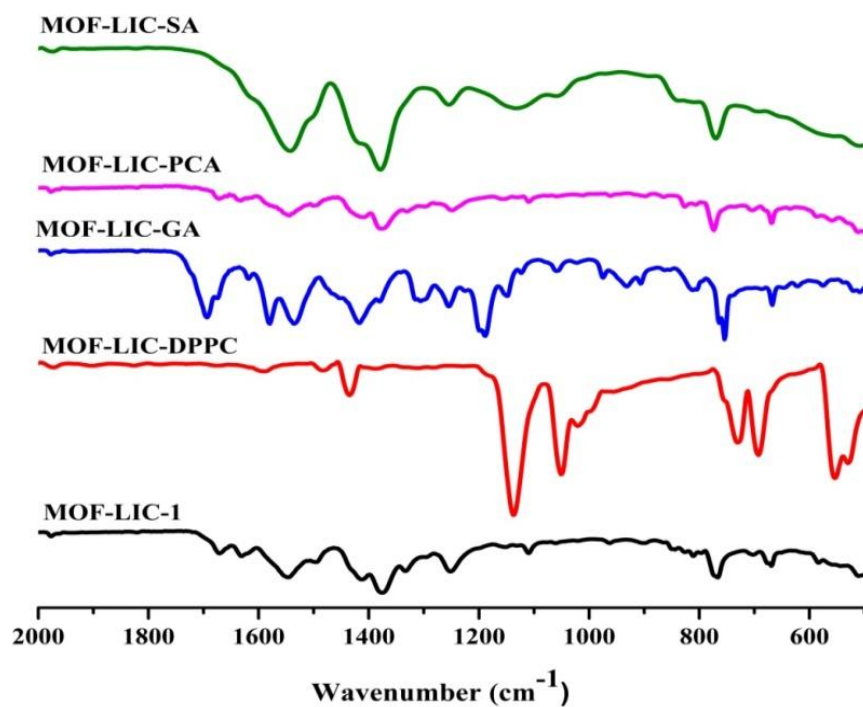

**Figure S1.** FTIR spectra of MOF-LIC-1 and its PSM MOFs.

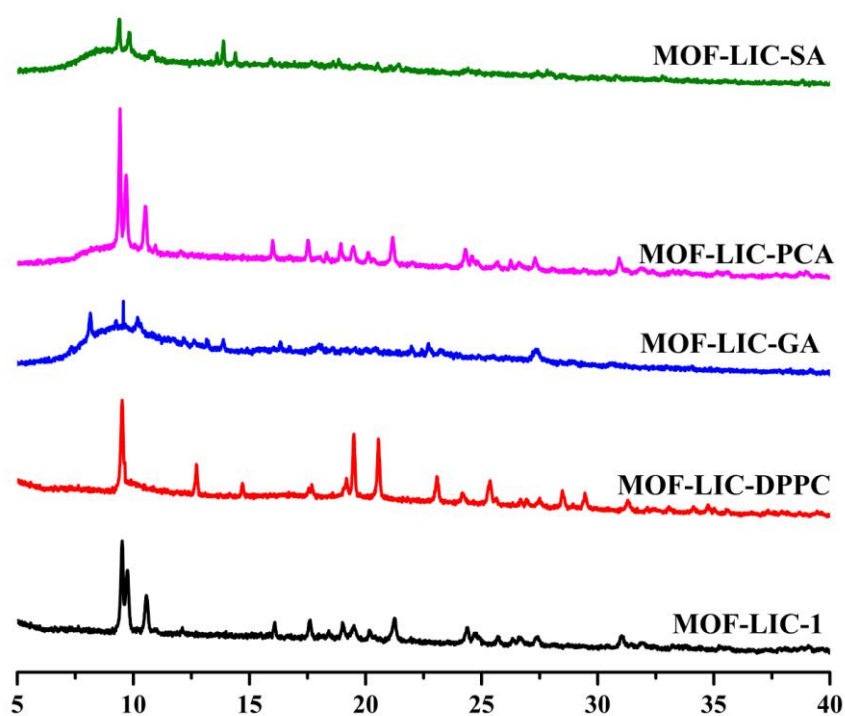

**Figure S2.** Powder XRD patterns of MOF-LIC-1 and its PSM MOFs.

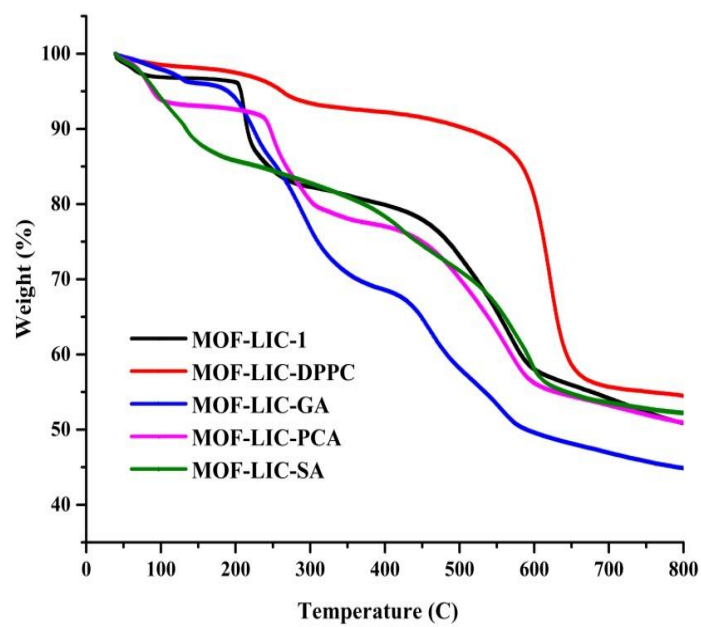

**Figure S3.** TGA plot of MOF-LIC-1 and its PSM MOFs.

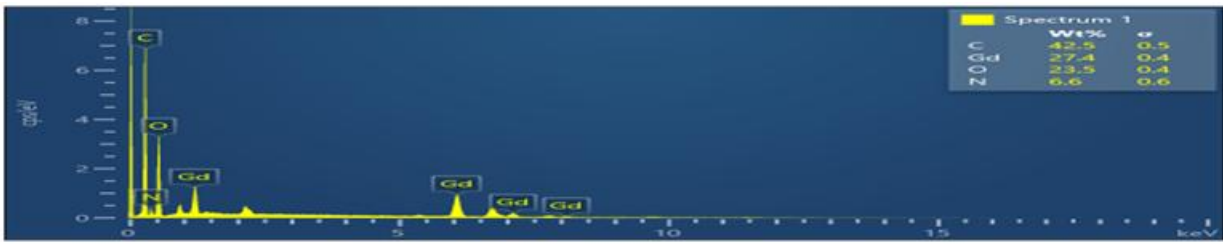

1(a)

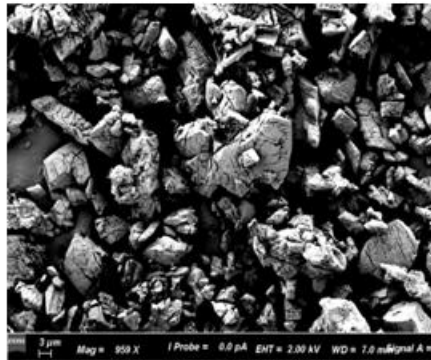

1(b)

Figure S4(a, b). EDX spectra & SEM image of MOF-LIC-1.

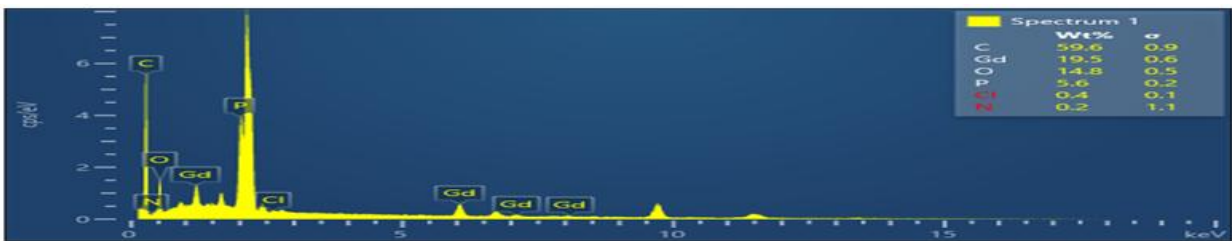

2(a)

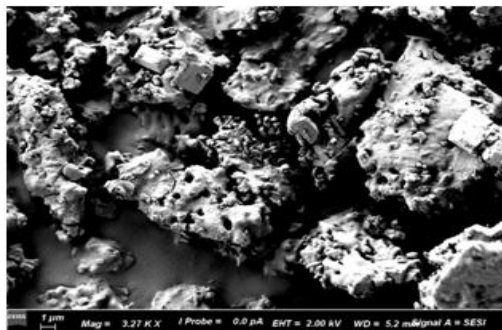

2(b)

Figure S5(a, b). EDX spectra & SEM image of MOF-LIC-DPPC.

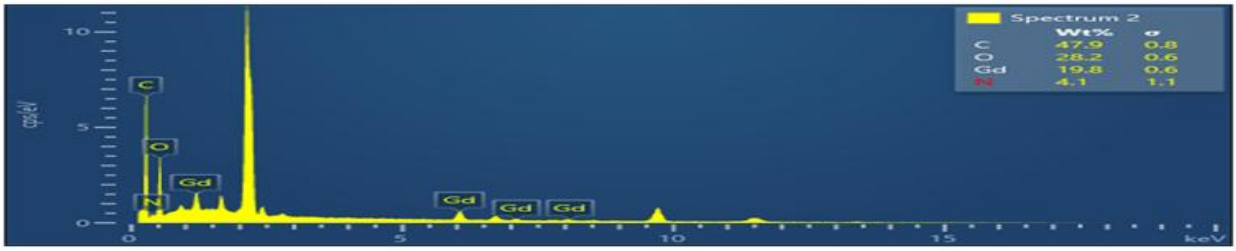

3(a)

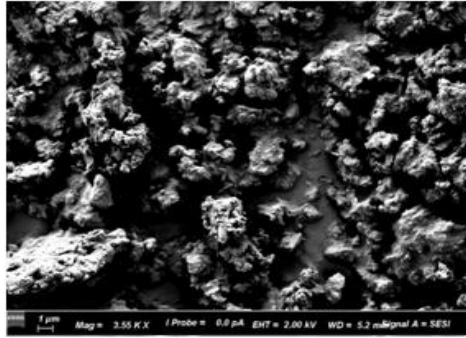

3(b)

Figure S6(a, b). EDX spectra & SEM image of MOF-LIC-GA.

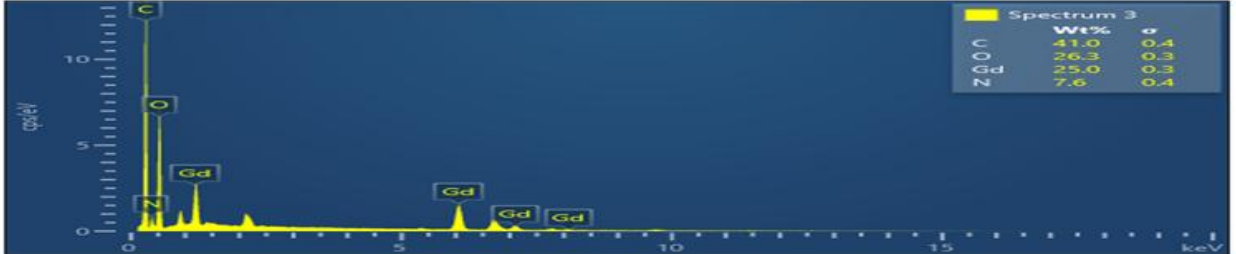

4(a)

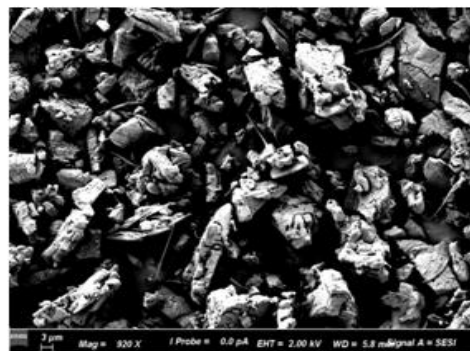

4(b)

Figure S7(a, b). EDX spectra & SEM image of MOF-LIC-PCA.

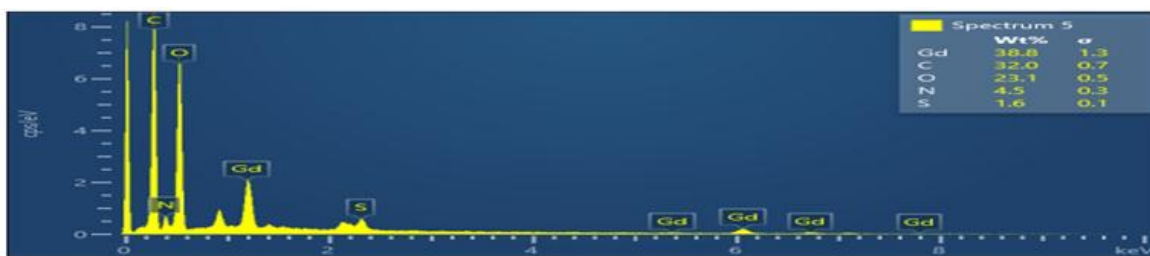

5(a)

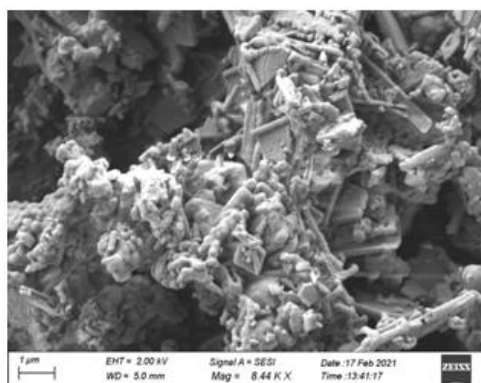

5(b)

**Figure S8(a, b).** EDX spectra & SEM image of MOF-LIC-SA.

**Chemical stability studies:**

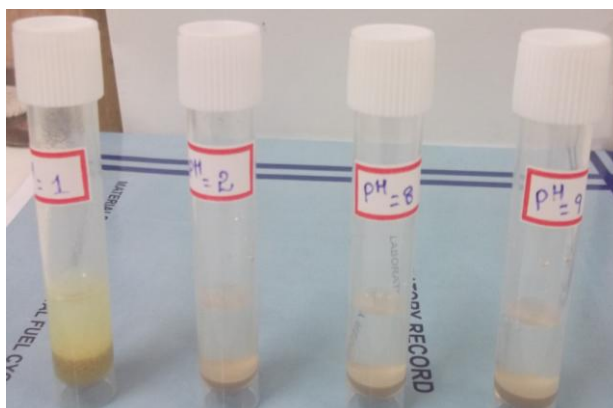

**Figure S9.** The image of MOF-LIC-1 with different pH solutions.

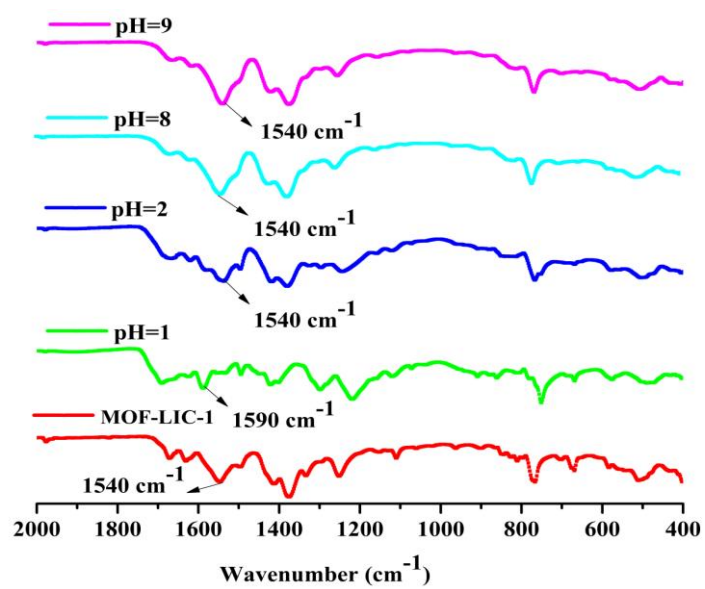

**Figure S10.** FTIR spectra of MOF-LIC-1 with different pH solutions.



## Kinetic Model

The kinetic study of sorption of U(VI) & Th(IV) on MOF-LIC-1 MOFs was appropriate for the linear form of pseudo-second-order kinetic model and is represented as:

$$\frac{t}{q_t} = \frac{1}{K_2 q_e^2} + \frac{t}{q_e}$$

Here,  $q_e$  ( $\text{mg g}^{-1}$ ) and  $q_t$  ( $\text{mg g}^{-1}$ ) are the amounts of U(VI) & Th(IV) sorption at equilibrium and time  $t$ , respectively,  $K_2$  ( $\text{g mg}^{-1} \text{min}^{-1}$ ) is the pseudo-second-order sorption rate constant. The model parameters and the correlation coefficient obtained are shown in Table S1.

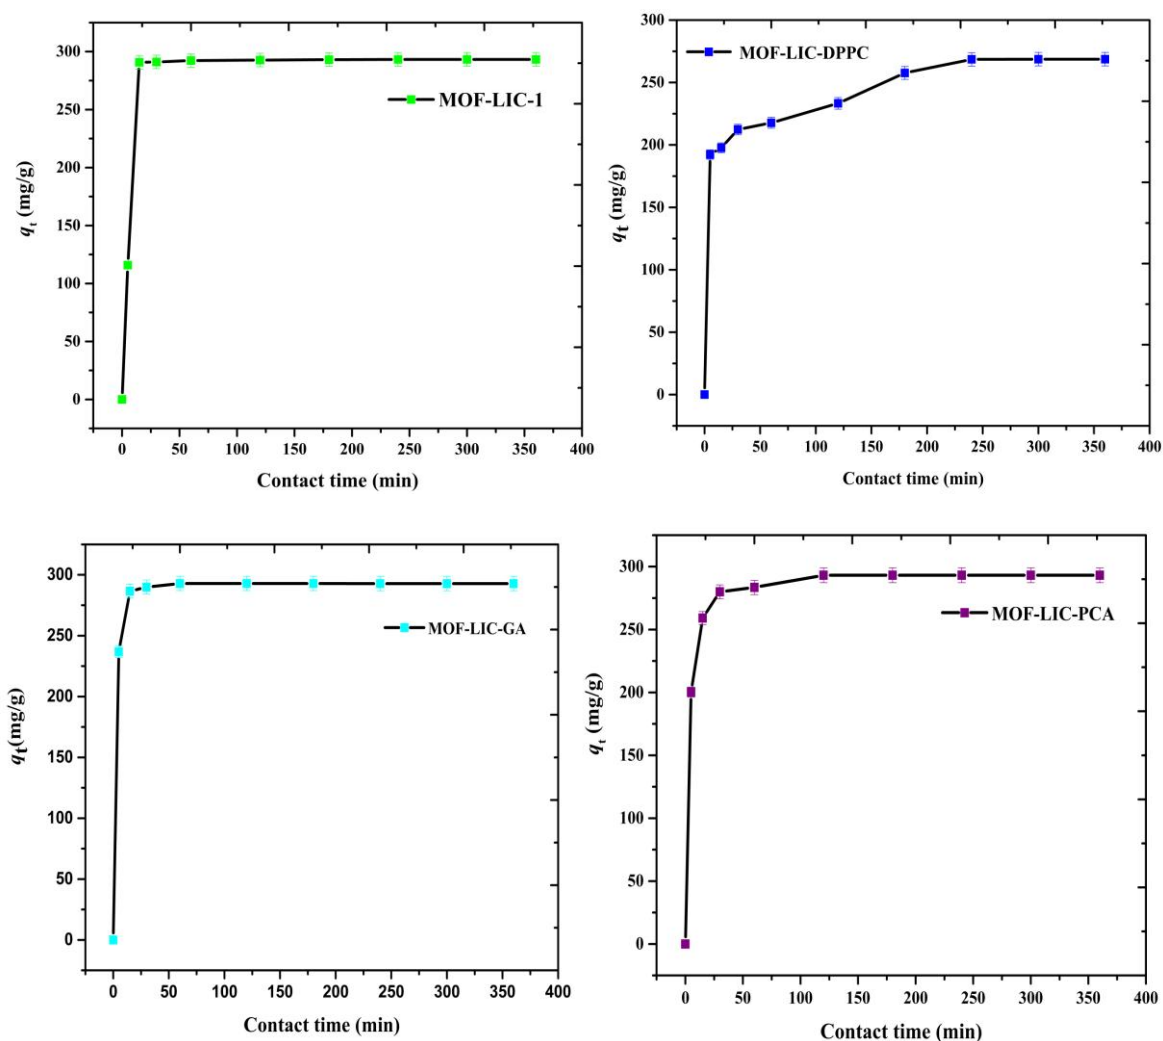

**Figure S11.** Effect of contact time on U(VI) sorption onto MOF-LIC-1 MOFs; at pH = 6; where  $t = 0$  to 300 min,  $m_{\text{sorbent}} = 10.0$  mg,  $V_{\text{solution}} = 3$  mL,  $C_0 = 1000$  mg  $\text{L}^{-1}$ ,  $T = 25 \pm 1^\circ\text{C}$ .

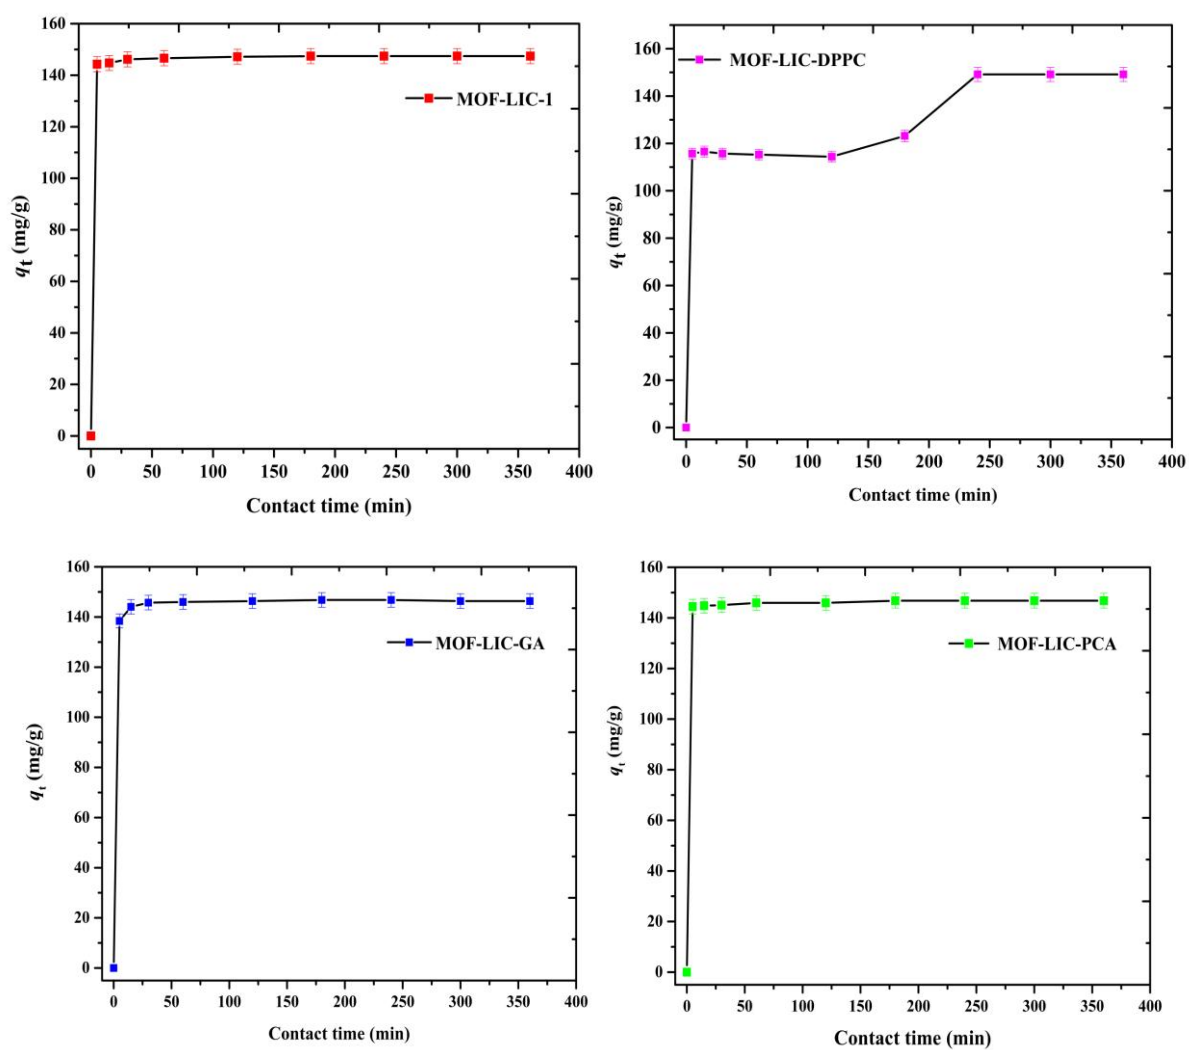

**Figure S12.** Effect of contact time on Th(IV) sorption onto MOF-LIC-1 MOFs; at pH = 6; where  $t = 0$  to 300 min,  $m_{\text{sorbent}} = 10.0$  mg,  $V_{\text{solution}} = 3$  mL,  $C_0 = 500$  mg L<sup>-1</sup>,  $T = 25 \pm 1^\circ\text{C}$ .

### Pseudo-second order fitting of MOF-LIC-1MOFs for U(VI) & Th(IV)

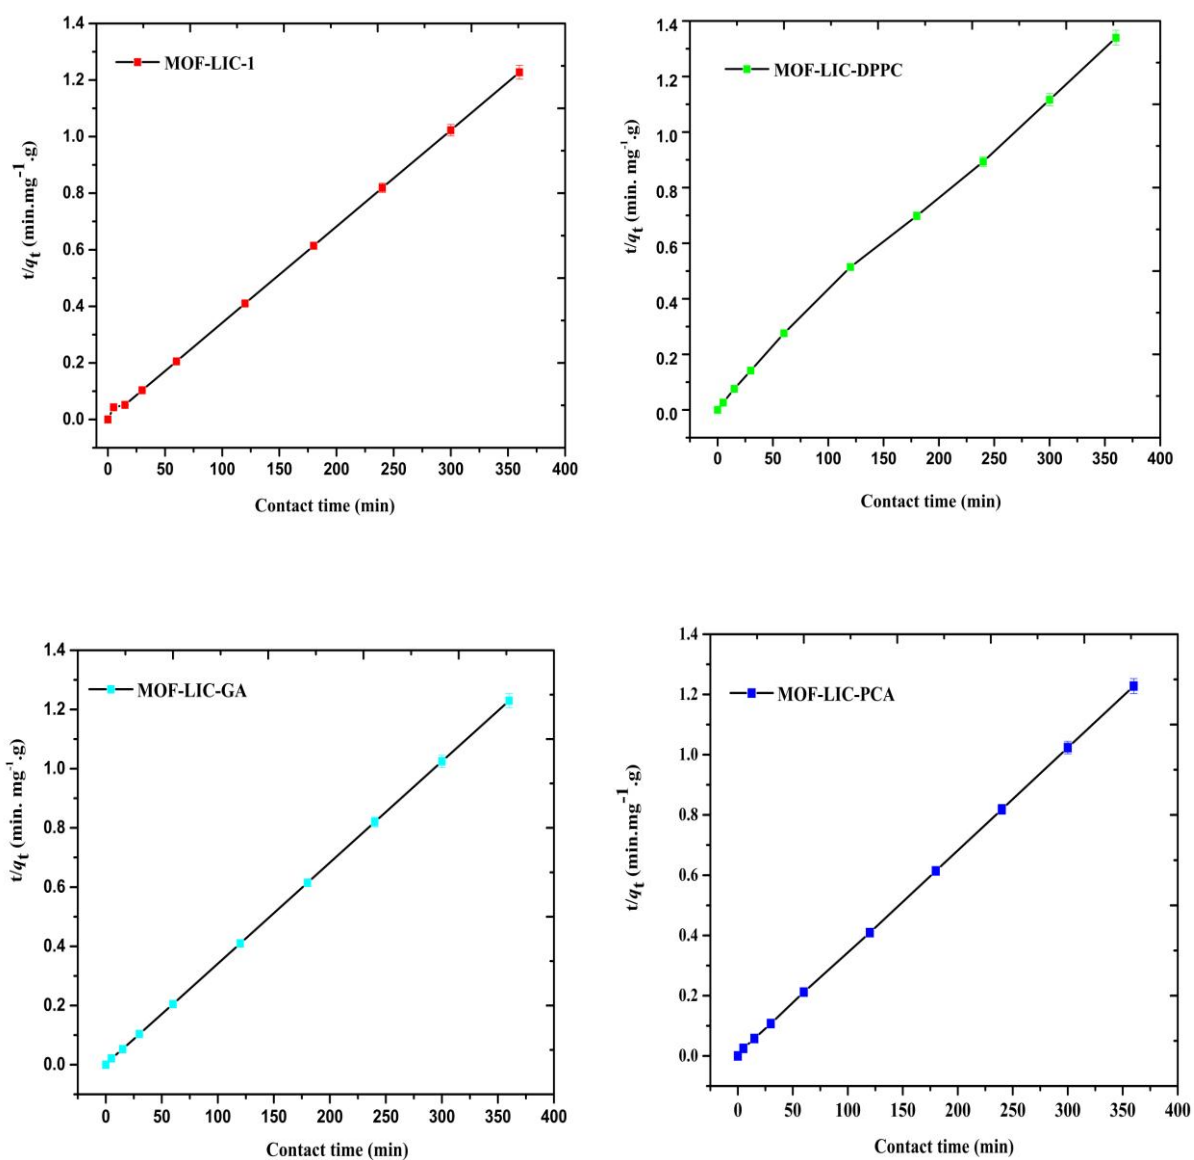

**Figure S13.** The plot of contact time vs  $t/q_t$  for U(VI) sorbed on MOF-LIC-1 and its PSM MOFs (pseudo second order);  $m_{\text{sorbent}}=10$  mg,  $t = 0$  to 360 min,  $V_{\text{solution}}= 3$  mL,  $C_o= 1000$  mg L<sup>-1</sup>,  $T = 25$  °C±1.

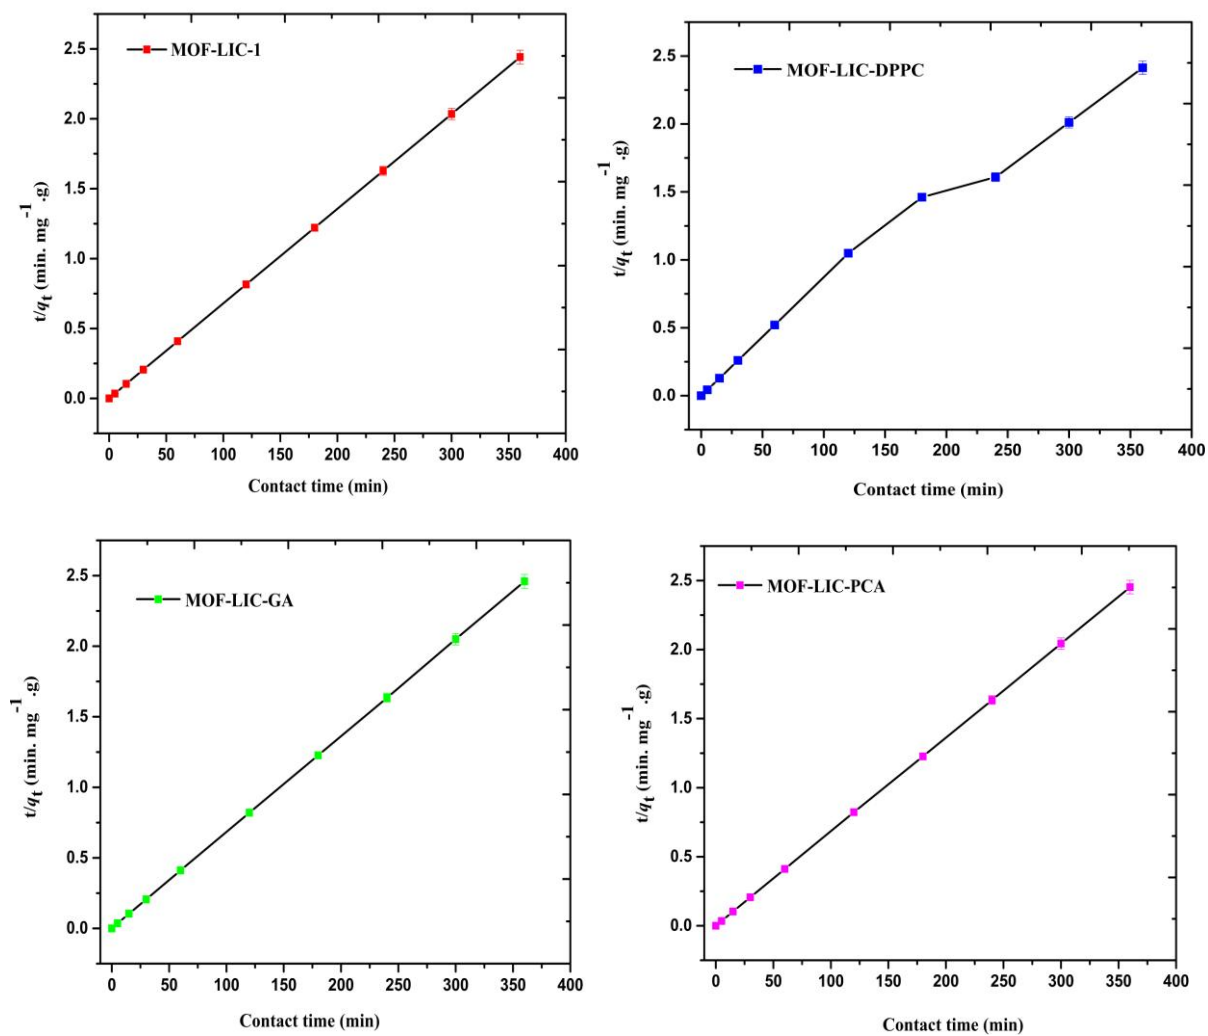

**Figure S14.** The plot of contact time vs  $t/q_t$  for Th(IV) sorbed on MOF-LIC-1 and its PSM MOFs (pseudo second order);  $m_{\text{sorbent}}=10$  mg,  $t = 0$  to 360 min,  $V_{\text{solution}}= 3$  mL,  $C_o= 500$  mg L<sup>-1</sup>,  $T = 25$  °C±1.

Table S1: Kinetic parameters for U(VI)/Th(IV) sorption onto MOF-LIC-1 MOFs:

| MOFs         | Pseudo-second-order kinetic model for U(VI) |                                               |                | Pseudo-second-order kinetic model for Th(VI) |                                               |                |
|--------------|---------------------------------------------|-----------------------------------------------|----------------|----------------------------------------------|-----------------------------------------------|----------------|
|              | $q_e$ (mg g <sup>-1</sup> )                 | $K_2$ (g mg <sup>-1</sup> min <sup>-1</sup> ) | R <sup>2</sup> | $q_e$ (mg g <sup>-1</sup> )                  | $K_2$ (g mg <sup>-1</sup> min <sup>-1</sup> ) | R <sup>2</sup> |
| MOF-LIC-1    | 238                                         | 0.00197                                       | 0.9998         | 128                                          | 0.03355                                       | 0.9999         |
| MOF-LIC-DPPC | 260                                         | 0.002326                                      | 0.9999         | 145                                          | 0.00057                                       | 0.9935         |
| MOF-LIC-GA   | 263                                         | 0.00977                                       | 0.9999         | 136                                          | 0.05881                                       | 0.9999         |
| MOF-LIC-PCA  | 254                                         | 0.009066                                      | 0.9999         | 146                                          | 0.02650                                       | 0.9999         |
| MOF-LIC-SA   | 282                                         | 0.000473                                      | 0.9988         | 149                                          | 0.02473                                       | 0.9999         |

**Table S1.** Leaching (%) of U(VI) sorbed onto MOFs:

| <b>MOF</b>          | <b>Eluents</b>                         | <b>Leaching (%)</b> |
|---------------------|----------------------------------------|---------------------|
| <b>MOF-LIC-1</b>    | 0.01 M HNO <sub>3</sub>                | 93                  |
| <b>MOF-LIC-DPPC</b> | 0.01 M Na <sub>2</sub> CO <sub>3</sub> | 91                  |
| <b>MOF-LIC-PCA</b>  | 0.01 M HNO <sub>3</sub>                | 95                  |
| <b>MOF-LIC-SA</b>   | 0.01 M HNO <sub>3</sub>                | 93                  |
| <b>MOF-LIC-GA</b>   | 0.01 M HNO <sub>3</sub>                | 95                  |

**Table S2.** Leaching (%) of Th(IV) sorbed onto MOFs:

| <b>MOF</b>          | <b>Eluents</b>                         | <b>Leaching (%)</b> |
|---------------------|----------------------------------------|---------------------|
| <b>MOF-LIC-1</b>    | 0.01 M Na <sub>2</sub> CO <sub>3</sub> | 91                  |
| <b>MOF-LIC-DPPC</b> | 0.01 M Na <sub>2</sub> CO <sub>3</sub> | 94                  |
| <b>MOF-LIC-GA</b>   | 0.01 M HNO <sub>3</sub>                | 93                  |
| <b>MOF-LIC-PCA</b>  | 0.01 M HNO <sub>3</sub>                | 98                  |
| <b>MOF-LIC-SA</b>   | 0.01 M HNO <sub>3</sub>                | 91                  |

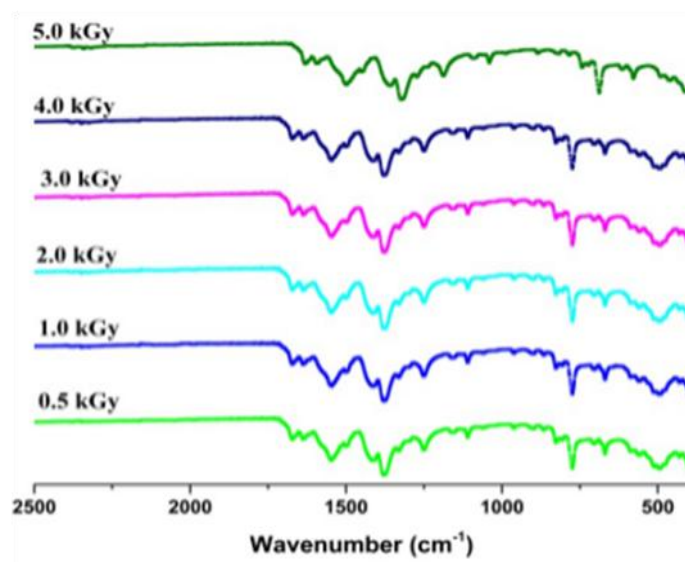

**Figure S15.** FTIR spectra of MOF-LIC-1 at different gamma dosage.

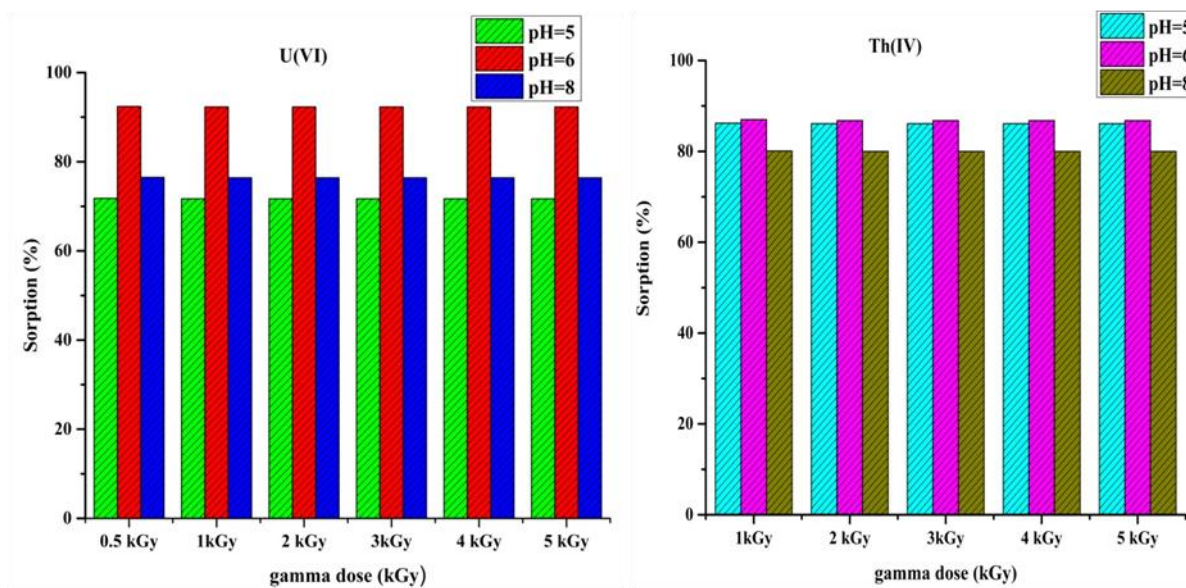

**Figure S16.** Sorption(%) of U(VI) &Th(IV) on irradiated MOF-LIC-1 at different pH(acidic/basic/neutral)

## Coordinates of Optimized Geometries of Ligands:

### Ligand-1

|   |                   |                   |                   |
|---|-------------------|-------------------|-------------------|
| C | -0.91520004293151 | -0.37225520755908 | -0.96754187724197 |
| C | -2.05667066665584 | -0.78347009944378 | -0.27214872604962 |
| C | 0.20730309109141  | 0.09533684387999  | -0.28454780394622 |
| H | -2.93144900654206 | -1.15041662516617 | -0.80957123378380 |
| H | 1.09155703752725  | 0.41571927128359  | -0.84107325406633 |
| C | -2.05637508164746 | -0.71786641566004 | 1.12471878999143  |
| C | 0.21236242882729  | 0.16250434519110  | 1.12155226943480  |
| H | -2.93708987476703 | -1.03521218831707 | 1.68635863300632  |
| C | -0.93975608174012 | -0.25067554808113 | 1.81736617389624  |
| H | -0.95636322625674 | -0.19712117400173 | 2.90905493163086  |
| H | -0.89397711622568 | -0.41787770097069 | -2.05836375567270 |
| N | 1.31025025766882  | 0.68776782335136  | 1.80884907720803  |
| H | 1.41169989820928  | 0.37382290309248  | 2.76973883284569  |
| H | 2.19143129044237  | 0.65882621440117  | 1.30398229274727  |

### Ligand-2

|   |                   |                  |                   |
|---|-------------------|------------------|-------------------|
| C | 0.78713450235333  | 1.53782060846457 | -0.91971513843155 |
| C | -0.47061263083047 | 0.98108196648269 | -0.63129023693462 |
| C | 1.44254308317631  | 2.34253277545818 | 0.02345309274983  |
| H | -0.97963195525451 | 0.34510491355684 | -1.37110958737064 |
| H | 2.43446453583545  | 2.76514824610480 | -0.20424083222264 |
| C | -1.07323286456347 | 1.25464110971532 | 0.60855069152210  |
| C | 0.83275777346437  | 2.62444415085169 | 1.26831267948391  |
| H | -2.06485797866488 | 0.83769205347596 | 0.84265845610137  |
| C | -0.44111829042733 | 2.07767884998889 | 1.55373257074719  |
| H | -0.93276454615016 | 2.32512714521082 | 2.50533770756987  |



|   |                  |                  |                   |
|---|------------------|------------------|-------------------|
| H | 1.27264206478449 | 1.33706146707106 | -1.88737943922009 |
| N | 1.49157263103041 | 3.46880069012470 | 2.18864714519146  |
| H | 2.40866165224837 | 3.82222958686371 | 1.89574447667887  |
| S | 1.53042685143584 | 3.16432532418449 | 3.88581192866691  |
| O | 2.66875758197882 | 3.96881520172090 | 4.34550331629029  |
| O | 0.16078967430132 | 3.29821002532814 | 4.39566206376753  |
| N | 1.94065144586289 | 1.54290003416613 | 4.13085988596027  |
| H | 1.19988970525147 | 0.90834341459286 | 3.80444674141026  |
| H | 2.85538643416771 | 1.30960537563818 | 3.72377646703960  |

### Ligand-3

|   |                   |                   |                  |
|---|-------------------|-------------------|------------------|
| C | -5.81142482731717 | -1.91859138400016 | 4.57741785529102 |
| C | -6.25534772429940 | -1.49826557559547 | 5.84279671289589 |
| C | -4.60264940453804 | -1.44148289233569 | 4.05002384607458 |
| H | -7.20292903021263 | -1.87585771654065 | 6.25442357074043 |
| H | -4.25996140278183 | -1.78492532418163 | 3.06066283104309 |
| C | -5.47516693151237 | -0.58075194442957 | 6.56793554662647 |
| C | -3.81488834462791 | -0.52011405070288 | 4.78063472245194 |
| H | -5.81277763520606 | -0.22895413842582 | 7.55500689390669 |
| C | -4.27034704982227 | -0.08419478367214 | 6.04877760894120 |
| H | -3.69207112169849 | 0.67112295254382  | 6.60060485956945 |
| H | -6.41086146887307 | -2.63093797205266 | 3.98842028795069 |
| N | -2.60390987753479 | -0.05678879331228 | 4.23334077885003 |
| H | -2.41680837529931 | -0.31300627551303 | 3.26156185053465 |
| P | -1.39090362588814 | 0.87077961711545  | 5.02592406149898 |
| O | -1.86280885983138 | 2.13885928393877  | 5.70444963505304 |
| C | -0.57911283993814 | -0.26869894684615 | 6.20884112088337 |
| C | -0.10246206766891 | 0.28276920668137  | 7.41710173899858 |

|   |                   |                   |                  |
|---|-------------------|-------------------|------------------|
| C | -0.43037197278913 | -1.64958664335217 | 5.95938396386438 |
| C | 0.53409213539295  | -0.54065092980203 | 8.36008186990658 |
| C | 0.20833854024275  | -2.46872974187260 | 6.90508103643084 |
| C | 0.69318867741960  | -1.91380324522532 | 8.10300220960952 |
| H | -0.25533103221629 | 1.35668586178035  | 7.60623826835760 |
| H | -0.83219396409326 | -2.08433208664135 | 5.03080900182539 |
| H | 0.90067058537978  | -0.11060239559892 | 9.30509629444060 |
| H | 0.32037295626919  | -3.54690911927461 | 6.71026778513006 |
| H | 1.18891631923163  | -2.55868889211223 | 8.84554157067671 |
| C | -0.25244894587181 | 1.15897754297271  | 3.61503232822378 |
| C | 0.95171376734869  | 0.45059571257067  | 3.42145205836474 |
| C | -0.60232918042378 | 2.19878806218235  | 2.72382784865402 |
| C | 1.78837218042115  | 0.76729561575193  | 2.33703854992936 |
| C | 0.23237470685888  | 2.50549701399514  | 1.63798844010589 |
| C | 1.42780380748215  | 1.79012516525184  | 1.44354337102990 |
| H | 1.23952391575577  | -0.34775127192133 | 4.12311286913365 |
| H | -1.52148943709411 | 2.77869435957694  | 2.90216238810708 |
| H | 2.73008377202301  | 0.21530463152732  | 2.19492016114048 |
| H | -0.04339012495154 | 3.31617631177102  | 0.94544784347527 |
| H | 2.08672492666437  | 2.03779407074901  | 0.59661429328373 |

#### **Ligand-4**

|   |                   |                  |                   |
|---|-------------------|------------------|-------------------|
| C | 0.64122850635404  | 2.50579082193309 | -1.85227395886186 |
| C | -0.73612617115841 | 2.77871069856241 | -1.77533717806951 |
| C | 1.36495691865017  | 2.16757385447183 | -0.69951390011213 |
| H | -1.29855229139780 | 3.04614184346052 | -2.68292597106160 |
| H | 2.43680765338374  | 1.92672913629427 | -0.77101098436355 |
| C | -1.39352490299802 | 2.68921979063145 | -0.53429872121124 |
| C | 0.71226279292657  | 2.08787566623468 | 0.55747033981266  |

|   |                   |                   |                   |
|---|-------------------|-------------------|-------------------|
| H | -2.47363314725017 | 2.89323480246935  | -0.46659882713128 |
| C | -0.68289031961094 | 2.32874698766289  | 0.61810608409615  |
| H | -1.18382274869441 | 2.23878641280126  | 1.59380201905568  |
| H | 1.15815875886140  | 2.55122977733524  | -2.82401764850515 |
| N | 1.36814509603164  | 1.73645843853152  | 1.74516213286593  |
| C | 2.57350907846079  | 2.12740696342122  | 1.98254433491804  |
| H | 3.14659249942607  | 2.81266977403020  | 1.31359451208374  |
| C | 3.30999190742438  | 1.71525565471501  | 3.19424236260147  |
| C | 2.73143037110553  | 0.84774285835749  | 4.15086437262393  |
| C | 3.48302608032386  | 0.49924063142627  | 5.27810138581068  |
| C | 5.26620216261648  | 1.87774122113602  | 4.40576189684841  |
| C | 4.78103205457194  | 1.02319198337333  | 5.41354574613314  |
| H | 1.71060845074594  | 0.47696222870254  | 3.97905281684315  |
| H | 3.06625642957813  | -0.17291727415202 | 6.04485286083425  |
| H | 6.28228442670497  | 2.30538079585387  | 4.48346272221677  |
| H | 5.40968831989737  | 0.77587550345806  | 6.28270406939472  |
| N | 4.55860506104662  | 2.22209907428946  | 3.32017629317752  |

#### Ligand-5

|   |                  |                  |                  |
|---|------------------|------------------|------------------|
| C | 2.63980429296133 | 1.83777242984704 | 0.39496998352410 |
| C | 2.90550066194649 | 2.46435994039612 | 1.76929541744184 |
| O | 2.70229857278458 | 1.85471991235316 | 2.81739816881229 |
| N | 3.41624137105390 | 3.75112508224737 | 1.70655767473074 |
| H | 3.50862603642352 | 4.14372851676134 | 0.76732827585441 |
| C | 3.83909191074403 | 4.59994942446982 | 2.75091330585429 |
| C | 3.78197711917660 | 4.23239568037826 | 4.11601651041259 |
| C | 4.34176414054590 | 5.87520484101385 | 2.39828033134256 |
| C | 4.22601491314163 | 5.13760939033041 | 5.09284750877371 |
| C | 4.77973499433280 | 6.76664332365164 | 3.38658555855986 |

|   |                  |                   |                   |
|---|------------------|-------------------|-------------------|
| C | 4.72544631751468 | 6.40369805701863  | 4.74359305684295  |
| H | 3.38854275081157 | 3.24464001977509  | 4.38221352212000  |
| H | 4.38783267820356 | 6.16764724600529  | 1.33570784781408  |
| H | 4.17712184865388 | 4.83993800026261  | 6.15235119092799  |
| H | 5.16651296848691 | 7.75370977595761  | 3.08970437181096  |
| H | 5.06951536623073 | 7.10287256679680  | 5.52056368430043  |
| H | 0.48872071479670 | 0.64044823809896  | -3.91853858846795 |
| O | 0.69862920905200 | 0.04432968721869  | -3.16580667533267 |
| O | 0.82918731822739 | 2.07516875156714  | -2.18284938588440 |
| C | 0.91043979395002 | 0.86168648305396  | -2.09983215209410 |
| C | 1.24595747294800 | 0.06825986990115  | -0.84911593256133 |
| H | 2.16193413758294 | -0.52599809715620 | -1.06824638651962 |
| H | 0.44349034946969 | -0.68935722158689 | -0.71612603793177 |
| C | 1.41352342881250 | 0.91689294802054  | 0.41359239246251  |
| H | 1.49725057229334 | 0.25153423980066  | 1.29653406483568  |
| H | 0.50012916199486 | 1.52976989873818  | 0.56785957094133  |
| H | 3.54764579046465 | 1.24298585557149  | 0.13766127538866  |
| H | 2.52848036439563 | 2.61106267150713  | -0.39253765795923 |

## Coordinates of Optimized Geometries of Ligands:

### Uranyl-Ligand-1(m)

|   |                   |                   |                   |
|---|-------------------|-------------------|-------------------|
| U | -1.07998639474463 | -0.20830737342824 | -1.22693362402087 |
| H | -2.09757680369819 | 1.65337671541786  | -3.77056038099776 |
| O | -2.48105224746872 | -1.29596478384049 | -1.12272853835539 |
| H | 1.56498358224500  | -1.91286000931294 | -1.57534412790653 |
| O | 0.42325535706173  | 0.74404514112775  | -1.20815680947331 |
| H | -1.98303122594993 | -1.83436671392662 | -3.77462578185894 |
| H | -2.55269881984119 | 2.51015607980086  | -1.00973268050969 |
| O | -1.44747246622505 | 1.62839739597428  | -3.04359244883959 |
| H | -0.70495646446394 | 2.20373396893420  | -3.30769865114423 |
| O | -1.27260696736372 | -1.19777055769077 | -3.56976890777259 |
| H | -0.71291673432671 | -1.12653060466055 | -4.36486889397335 |
| O | 0.60730044642095  | -2.07600818649359 | -1.48752393667142 |
| H | 0.45158868848918  | -3.00089536272933 | -1.75443107276543 |
| O | -2.61535741143848 | 1.62613903090379  | -0.60513159551369 |
| H | -3.04157191555898 | 1.71977380331603  | 0.27739252991583  |
| C | -3.35201989773041 | 0.82749659197142  | 2.37598694144610  |
| C | -2.72892763332818 | 2.06078971542756  | 2.62832180084934  |
| C | -2.60941866027416 | -0.24653888465161 | 1.88668565627917  |
| H | -3.31241843982283 | 2.88933229657825  | 3.03125158513283  |
| H | -3.08516065395148 | -1.21174693584377 | 1.70661279755295  |
| C | -1.35399675037983 | 2.22045640304223  | 2.39932159307281  |
| C | -1.23014051335229 | -0.07563043939376 | 1.64915636517920  |
| H | -0.86851292047181 | 3.17009026119621  | 2.62387210799905  |
| C | -0.59870946575448 | 1.16036917237252  | 1.90648616814825  |
| H | 0.47429895246936  | 1.27470716517848  | 1.74247020991379  |
| H | -4.41417539995612 | 0.69710689637264  | 2.58456359360141  |

|   |                   |                   |                  |
|---|-------------------|-------------------|------------------|
| N | -0.47928561223167 | -1.13755957766962 | 1.06628701095267 |
| H | 0.51639122367214  | -1.11554298727659 | 1.30180447281548 |
| H | -0.85948138102527 | -2.06733506369624 | 1.26329844594399 |

**Uranyl-Ligand-2(m)**

|   |                   |                   |                   |
|---|-------------------|-------------------|-------------------|
| C | 0.95670762374252  | 0.47485065108771  | 0.54023500388367  |
| C | -0.16086043194892 | 0.71018478481941  | -0.26969335239987 |
| C | 1.10216057061617  | 1.15528508221733  | 1.74648944815119  |
| H | -0.27341452490401 | 0.17071703103737  | -1.20987860634096 |
| H | 1.96122609176031  | 0.96456607779524  | 2.39174374059292  |
| C | -1.12760722471760 | 1.64498118589460  | 0.11861253167306  |
| C | 0.12997697495543  | 2.09416193842102  | 2.11841681135059  |
| H | -1.98596569125644 | 1.84230358758785  | -0.52319622005025 |
| C | -0.98383750833908 | 2.35400958549676  | 1.30994729021942  |
| H | -1.70683326110544 | 3.12073201409804  | 1.58749923916670  |
| H | 1.71265484451184  | -0.24841664882533 | 0.23531681494610  |
| N | 0.31449107013236  | 2.78699862778994  | 3.36086162553418  |
| H | 1.24834366250334  | 3.06693572556064  | 3.65966101570293  |
| S | -0.86824838500896 | 3.14143445194389  | 4.40015730333737  |
| O | -0.10191000642057 | 3.54296556110431  | 5.61971826216378  |
| O | -1.83760058668536 | 4.13957147430684  | 3.96659681313959  |
| N | -1.70348466577583 | 1.78524080465640  | 4.63871142338052  |
| H | -2.68515102188805 | 1.80904802884032  | 4.36584359127236  |
| H | -1.21609611778683 | 0.89605643937067  | 4.53503129150356  |
| U | -0.63325694547655 | 4.81660068491864  | 7.62137742204107  |
| H | -1.68354063854827 | 5.58753789345150  | 4.89742565182808  |
| O | -2.21938492803735 | 4.02060645384044  | 7.68291026185909  |
| H | 1.52459081354951  | 2.64459108411860  | 8.43038807029082  |

|   |                   |                  |                   |
|---|-------------------|------------------|-------------------|
| O | 0.95212885207389  | 5.61430397526916 | 7.66564018090918  |
| H | 0.07442659941851  | 5.04030597956516 | 10.73196397666179 |
| H | -1.24212368667209 | 7.73558433030165 | 8.79942894987759  |
| O | -1.38738984986171 | 6.13336783800589 | 5.67952341420313  |
| H | -0.96135385666833 | 6.94087830364376 | 5.33926839934654  |
| O | 0.55683649632778  | 2.75438410604984 | 8.39370627832914  |
| H | 0.15919408594759  | 1.93580994634028 | 8.74205713241708  |
| O | -0.66668475523454 | 4.83756646690871 | 10.13205265944256 |
| H | -1.45791610477762 | 4.70847284962348 | 10.68707730073511 |
| O | -1.68066889148451 | 6.97526737113553 | 8.37577949566368  |
| H | -2.59332295294113 | 7.24798585962396 | 8.16680253416764  |

#### **Uranyl-Ligand-2(b)**

|   |                   |                  |                   |
|---|-------------------|------------------|-------------------|
| C | -1.84457118995837 | 6.78532726993165 | 0.11127472610180  |
| C | -2.02396353072240 | 8.14740359082786 | 0.37881335864697  |
| C | -1.54659929734240 | 5.90143080547001 | 1.14855990653460  |
| H | -2.26149663437451 | 8.83182638078735 | -0.43544423279129 |
| H | -1.41030844941775 | 4.83654914777685 | 0.95479351218601  |
| C | -1.89187418340330 | 8.63677424808777 | 1.68225620778798  |
| C | -1.41144597700151 | 6.41038453718112 | 2.44275424643850  |
| H | -2.01959878541660 | 9.70019543580358 | 1.88296887289474  |
| C | -1.57397157574281 | 7.76928601790078 | 2.72689487472660  |
| H | -1.43598195158461 | 8.14225404889513 | 3.74190392001663  |
| H | -1.94257467447040 | 6.40845783312273 | -0.90656068958584 |
| N | -1.08397294425522 | 5.47886044575380 | 3.50421926106480  |
| H | -0.18314364693958 | 4.99543306828002 | 3.51403372544769  |
| S | -1.95478800360889 | 5.26253165561187 | 4.82215733866754  |
| O | -1.40108590635466 | 4.04077622673657 | 5.47877002977642  |

|   |                   |                  |                   |
|---|-------------------|------------------|-------------------|
| O | -1.94886343099808 | 6.32011420788451 | 5.87512162655457  |
| N | -3.44523830188770 | 5.22415575541687 | 4.27455129598138  |
| H | -4.20068849424163 | 5.53987936552402 | 4.87988737666317  |
| H | -3.66730539852348 | 4.68521044344622 | 3.43840134008859  |
| U | -0.96976559585510 | 4.97107210858362 | 7.76484272282666  |
| O | -2.59136178655088 | 4.53029894030667 | 8.33208562528988  |
| H | 0.51277022737946  | 2.21079425499221 | 7.52467083831500  |
| O | 0.69313550965927  | 5.40488387241550 | 7.32657703206103  |
| H | 0.70785724361623  | 4.87980823013734 | 10.43042749029533 |
| H | -0.68834056721216 | 8.01150816339369 | 8.48743557754169  |
| O | -0.34296546337748 | 2.58880354688062 | 7.80345011168611  |
| H | -0.96120970181161 | 1.84201166061655 | 7.91756865981096  |
| O | -0.19915257945413 | 4.73635824541498 | 10.09950669821363 |
| H | -0.74756635294458 | 4.47844345850266 | 10.86475338348047 |
| O | -1.30897442401064 | 7.26614659389510 | 8.59619592129356  |
| H | -2.14061456019434 | 7.63475341342189 | 8.94979783998441  |

### Uranyl-Ligand-3(m)

|   |                    |                  |                  |
|---|--------------------|------------------|------------------|
| C | -10.49458405476441 | 0.67645698457732 | 2.79323134142051 |
| C | -11.53749192012534 | 1.31561280516422 | 3.46948560464725 |
| C | -9.16593400846829  | 0.98097500139770 | 3.08684678104270 |
| H | -12.57414878169241 | 1.06752510197290 | 3.24465737077059 |
| H | -8.35970912370028  | 0.48190053078661 | 2.54584660333652 |
| C | -11.23624541652266 | 2.25609449250546 | 4.45699567170701 |
| C | -8.86132696698690  | 1.92395264457021 | 4.07658048121343 |
| H | -12.03784750935298 | 2.73805002081990 | 5.01817381543018 |
| C | -9.90416327435906  | 2.57024416845678 | 4.76651106101295 |
| H | -9.68728155285508  | 3.25653397580806 | 5.58403325903216 |



|   |                    |                   |                   |
|---|--------------------|-------------------|-------------------|
| H | -10.71418040568902 | -0.07096871527559 | 2.03061245330383  |
| N | -7.49078273335720  | 2.19678729613995  | 4.35156947961131  |
| H | -6.85388109226303  | 1.66902957934550  | 3.75329109785940  |
| P | -6.88538167901184  | 3.66719706347431  | 4.84288877054572  |
| O | -7.26258904877959  | 4.84168935360703  | 3.88356822927152  |
| C | -7.49821231511903  | 4.06224315724908  | 6.46093966668499  |
| C | -7.86964267972645  | 5.38382414798403  | 6.76373067767936  |
| C | -7.53250379384564  | 3.05869083685200  | 7.44638950222247  |
| C | -8.28664859656244  | 5.69370682001657  | 8.05766995921012  |
| C | -7.95264727121000  | 3.38361627865738  | 8.73351304094696  |
| C | -8.32824423683495  | 4.69738236445173  | 9.03783090963196  |
| H | -7.83354445794037  | 6.15355883171043  | 5.99282382026399  |
| H | -7.24553921890008  | 2.03465655679615  | 7.20382995905226  |
| H | -8.57771426972335  | 6.71496356097666  | 8.30345151985494  |
| H | -7.98781275521720  | 2.61216016385234  | 9.50261151943868  |
| H | -8.65443573864040  | 4.94550500960481  | 10.04817860436683 |
| C | -5.10599901245233  | 3.47574038986137  | 4.80945901462253  |
| C | -4.46303543847585  | 2.22975961667578  | 4.85352697311218  |
| C | -4.34406116988552  | 4.66450632986295  | 4.78933507797425  |
| C | -3.06768948362382  | 2.17237446493521  | 4.83921454673332  |
| C | -2.95007054540594  | 4.59306595846334  | 4.77675060711056  |
| C | -2.31312620454414  | 3.34722432614845  | 4.79330787129286  |
| H | -5.03481127849011  | 1.30363843863828  | 4.92362505437786  |
| H | -4.84033001615263  | 5.63715950474303  | 4.83310349406112  |
| H | -2.56881828129438  | 1.20380403547070  | 4.87433010200865  |
| H | -2.36108838185893  | 5.51066710905886  | 4.77313411410857  |
| H | -1.22433414185876  | 3.29374964580599  | 4.79005907510433  |
| U | -7.82464846168972  | 5.23526049206064  | 1.74489452688086  |

|   |                    |                  |                   |
|---|--------------------|------------------|-------------------|
| H | -6.69017339521941  | 5.33183944123507 | -1.25711201367253 |
| O | -7.74431394369323  | 3.50159869074725 | 1.33106130529910  |
| O | -8.04680564098737  | 6.98417633234871 | 1.99086563437875  |
| H | -10.52167758781161 | 5.54951782197023 | 3.21722188496935  |
| H | -4.71103900859511  | 5.33941683905757 | 1.16403085327886  |
| H | -10.06678016266285 | 6.20773457170746 | -0.30681399354924 |
| O | -6.62439716956472  | 5.86309155211171 | -0.44205143990721 |
| H | -6.55805656999302  | 6.79443124923071 | -0.72499237276777 |
| O | -5.32154449060858  | 5.32485572876351 | 1.92165794649857  |
| H | -4.82209541233533  | 5.03287230190117 | 2.71821384566266  |
| O | -10.02583634816319 | 4.83365898345546 | 2.77950133782616  |
| H | -10.16521187759292 | 4.01412490930002 | 3.33255732952207  |
| O | -9.55838117022082  | 5.40184463429895 | -0.10139518531876 |
| H | -10.11971842516935 | 4.64500434064483 | -0.35137397416609 |

### Uranyl-Ligand-3(b)

|   |                   |                   |                  |
|---|-------------------|-------------------|------------------|
| C | -5.12663661041799 | 0.33006845898233  | 3.59146824817191 |
| C | -6.03357424036620 | -0.57163347620947 | 3.02515030816748 |
| C | -5.51630815080731 | 1.64566214466270  | 3.85944701204987 |
| H | -5.72802063215230 | -1.59770928110165 | 2.82273571751409 |
| H | -4.81666288347692 | 2.34154532593462  | 4.32893028041232 |
| C | -7.33145847303996 | -0.15256702142884 | 2.72199308155257 |
| C | -6.82379348485844 | 2.05715031551158  | 3.55596240846693 |
| H | -8.04219585710601 | -0.84925542018733 | 2.27805259476237 |
| C | -7.73252758552073 | 1.15968821854369  | 2.97596732833568 |
| H | -8.74566248824028 | 1.47170124507863  | 2.72634058978258 |
| H | -4.11473158069788 | 0.00975064263128  | 3.83989166490328 |
| N | -7.17574606481920 | 3.43645619322254  | 3.76849484142474 |

|   |                    |                   |                   |
|---|--------------------|-------------------|-------------------|
| H | -6.41251027602300  | 3.95279381686725  | 4.21686124142940  |
| P | -8.73096899474412  | 3.98061172383302  | 4.35246430918093  |
| O | -9.35170391581464  | 4.49897877986465  | 3.02839387069307  |
| C | -9.64004640004028  | 2.62479365232912  | 5.02967560567738  |
| C | -10.91383701639801 | 2.32818621829917  | 4.51526687591033  |
| C | -9.07614257613483  | 1.85224361222312  | 6.06305643398025  |
| C | -11.62632989235079 | 1.25450228265128  | 5.04742077320536  |
| C | -9.79842971443641  | 0.78062233943529  | 6.57939755544012  |
| C | -11.06978257666778 | 0.48416739439081  | 6.07293004570780  |
| H | -11.33518128768976 | 2.93346274319502  | 3.71258122881945  |
| H | -8.08457439042960  | 2.08276546926454  | 6.45629002491651  |
| H | -12.61856865979103 | 1.01917589424799  | 4.66285337781506  |
| H | -9.37221338375238  | 0.17426383286037  | 7.37842228068410  |
| H | -11.63132350551357 | -0.35533094650373 | 6.48376982342142  |
| C | -8.38056855206860  | 5.24567912477620  | 5.54387769966436  |
| C | -8.98284690815254  | 5.18214451710102  | 6.81502003156228  |
| C | -7.52858241288740  | 6.31981907243332  | 5.20810052820596  |
| C | -8.71821954733670  | 6.18325940668963  | 7.74810871095630  |
| C | -7.27167796349847  | 7.30745100898910  | 6.15368721285162  |
| C | -7.86304147572889  | 7.23863728579477  | 7.42133894853805  |
| H | -9.65479596709394  | 4.36260833831964  | 7.06776835825689  |
| H | -7.08631935845929  | 6.39784285398007  | 4.21383958863972  |
| H | -9.18408279828508  | 6.13948401510653  | 8.73239344378477  |
| H | -6.61404779856159  | 8.13948093757270  | 5.90212388265366  |
| H | -7.65926550314019  | 8.01831110628095  | 8.15575958828567  |
| U | -7.83544815413921  | 4.48556316542664  | 1.29564335407246  |
| H | -7.07650784102867  | 4.47911762238334  | -1.76943544816421 |
| O | -8.68581568688472  | 3.13011204012318  | 0.51970805774869  |

|   |                    |                  |                   |
|---|--------------------|------------------|-------------------|
| O | -6.97626168163404  | 5.94647552006845 | 1.85475175923109  |
| H | -5.44478870759997  | 2.47753954558973 | 1.70146942704715  |
| H | -9.68932777440989  | 6.92075806237253 | 0.61766416220894  |
| O | -6.89316930489300  | 5.00056123377297 | -0.96561417771910 |
| H | -6.49880256928580  | 5.84463548741698 | -1.25350312469479 |
| O | -5.64645193109937  | 3.26264238417101 | 1.14346092953781  |
| H | -4.80698979461494  | 3.58742853160860 | 0.77214611684582  |
| O | -9.56980952013087  | 5.98545075474711 | 0.36893195165415  |
| H | -10.41208994377571 | 5.68026358767686 | -0.01665871759313 |

#### **Uranyl-Ligand-4(m)**

|   |                   |                   |                  |
|---|-------------------|-------------------|------------------|
| C | -2.17192771632913 | -4.93606770235657 | 4.16153850222749 |
| C | -1.21792608208326 | -5.66281670040884 | 3.42540338168326 |
| C | -2.18117589208811 | -3.55169910801136 | 4.11556003986099 |
| H | -1.22120188515290 | -6.75231850375355 | 3.46576236139138 |
| H | -2.93542641586840 | -2.98154386422591 | 4.65967778857021 |
| C | -0.27972161044937 | -4.99758352674679 | 2.62355027446707 |
| C | -1.22505917058147 | -2.87222163811776 | 3.31743893392410 |
| H | 0.44683636063624  | -5.56860600122307 | 2.04605283203608 |
| C | -0.29259350735885 | -3.61262813255642 | 2.54883713292540 |
| H | 0.41192998275557  | -3.06978762272382 | 1.91911698058602 |
| H | -2.90995740384079 | -5.46830944939865 | 4.76198437885143 |
| N | -1.17933755182566 | -1.49883467923716 | 3.20606728601895 |
| C | -1.54400834388129 | -0.67931169801905 | 4.12754427692328 |
| H | -1.80429448978605 | -1.01350225540952 | 5.14600066057136 |
| C | -1.56890124761344 | 0.75848869778795  | 3.87295741196446 |
| C | -0.99629233285147 | 1.29581158460459  | 2.70842697248284 |
| C | -0.95814889495475 | 2.67143615523564  | 2.53004869283096 |

|   |                   |                   |                  |
|---|-------------------|-------------------|------------------|
| C | -2.07004976723882 | 2.91226484358687  | 4.64418940749913 |
| C | -1.49357229682788 | 3.49783118183431  | 3.52624135254583 |
| H | -0.57365705992181 | 0.60527154580047  | 1.97983671291994 |
| H | -0.50346348492201 | 3.10130126698055  | 1.63704693312296 |
| H | -2.50273732406662 | 3.52580513555323  | 5.43403311819795 |
| H | -1.46408232107969 | 4.58352912602546  | 3.44214871640255 |
| N | -2.13221337590156 | 1.56577422465000  | 4.82724516059568 |
| U | -3.76085286031176 | 0.78949967890459  | 6.62141210171759 |
| H | -5.49619607611343 | 0.74993436327332  | 3.97471964489259 |
| O | -4.00988701520300 | -0.91081052664590 | 6.12733047187784 |
| H | -0.60732146452912 | 0.90686602199844  | 7.02177465198725 |
| O | -3.72677020850861 | 2.47121638480772  | 7.21256338622074 |
| H | -3.69233851962654 | 0.56680540586325  | 9.80601790424906 |
| H | -6.59243219344966 | 1.51142936890910  | 7.87677003104259 |
| O | -5.17515155575974 | 1.38152610719800  | 4.64393967946665 |
| H | -5.44752524546683 | 2.27053696246378  | 4.35179637365380 |
| O | -1.36759112215507 | 0.40778394346175  | 7.37045240968044 |
| H | -1.13948944365914 | 0.12147550706536  | 8.27384834397315 |
| O | -3.56423504120213 | -0.02150903599324 | 9.03803260241603 |
| H | -3.82986108203956 | -0.91421256647708 | 9.32849023139118 |
| O | -6.11910933564654 | 0.74552816507621  | 7.50249734731324 |
| H | -6.77232542009700 | 0.02907025822418  | 7.40200129151774 |

**Uranyl-Ligand-4(b)**

|   |                   |                   |                   |
|---|-------------------|-------------------|-------------------|
| C | 0.26315011320126  | 0.81702940003642  | 10.74209586668267 |
| C | -0.35855874689123 | -0.28754841232738 | 11.33362088500721 |
| C | -0.02938706031827 | 1.16923826722283  | 9.42441598431415  |
| H | -0.12573596924809 | -0.55652428666655 | 12.36378143548692 |
| H | 0.42428689749246  | 2.05274299169657  | 8.97281315700818  |

|   |                   |                   |                   |
|---|-------------------|-------------------|-------------------|
| C | -1.27632785133689 | -1.05169095086601 | 10.60207881028529 |
| C | -0.94699335937910 | 0.39930137132645  | 8.69265178132042  |
| H | -1.74091310208031 | -1.92885334718485 | 11.05291467113073 |
| C | -1.58353743936722 | -0.71094702501686 | 9.28309482966326  |
| H | -2.25340868649778 | -1.33384222179371 | 8.68785879932863  |
| H | 0.97535912075471  | 1.41385636620162  | 11.31221330503781 |
| N | -1.29176265104963 | 0.75727443214310  | 7.35944601708109  |
| C | -0.35372617106689 | 0.97392357551758  | 6.49151647910186  |
| H | 0.70055554198468  | 0.84156578767088  | 6.76451313935747  |
| C | -0.67356497285237 | 1.35438166421379  | 5.13134691741355  |
| C | 0.33780780938488  | 1.61416271272182  | 4.20248413409170  |
| C | -0.00939606044977 | 1.97784089010618  | 2.90027402334038  |
| C | -2.31892227409478 | 1.78921040013011  | 3.55296283779927  |
| C | -1.36016179535025 | 2.06672140154407  | 2.57360345744522  |
| H | 1.38207394632036  | 1.53442848381835  | 4.50521331054828  |
| H | 0.76107321854573  | 2.18740655782182  | 2.15823801483468  |
| H | -3.38035599367224 | 1.84425674856711  | 3.31823049876851  |
| H | -1.68433959856292 | 2.34370944422788  | 1.57106665308261  |
| N | -1.99975364662168 | 1.43363509992824  | 4.80802052966432  |
| U | -3.71538456048405 | 1.16069165447476  | 6.70589635990207  |
| H | -5.46264784478913 | 0.12076938852767  | 4.31642681251494  |
| O | -3.83929442204913 | -0.61119918846457 | 6.70929772699218  |
| O | -3.76367322371918 | 2.93488501255953  | 6.69632155201613  |
| H | -3.66567122349288 | 2.28934486598656  | 9.63813047282006  |
| H | -6.58561201175415 | 2.02013216625658  | 7.80452487073844  |
| O | -5.15996133865622 | 0.98933702955807  | 4.64426343778235  |
| H | -5.83421475256318 | 1.64056490512141  | 4.37232192693367  |
| O | -3.67211414944520 | 1.43173850471237  | 9.17360177343319  |

|   |                   |                  |                  |
|---|-------------------|------------------|------------------|
| H | -3.11389491287574 | 0.80674613929831 | 9.69514451195307 |
| O | -6.11821270494384 | 1.23151193705928 | 7.47136249515614 |
| H | -6.61942264607164 | 0.45555404587043 | 7.78536301796260 |

**Uranyl-Ligand-5(m)**

|   |                   |                   |                   |
|---|-------------------|-------------------|-------------------|
| C | 1.65341120050218  | 2.81445543740133  | -3.71272347497527 |
| C | 0.68509129939713  | 2.11382242477254  | -4.63967385654211 |
| O | 0.82032193761267  | 2.14290009449839  | -5.90417106983874 |
| N | -0.35944983337138 | 1.50568788861727  | -4.07204228306152 |
| H | -0.35855780769317 | 1.46261997308657  | -3.05239269198742 |
| C | -1.49221825744210 | 0.93380601507376  | -4.73429666631219 |
| C | -2.17528748801243 | 1.66310122930135  | -5.71812620544777 |
| C | -1.92404543603098 | -0.33752458703091 | -4.34712258258192 |
| C | -3.28767368164442 | 1.08480278830915  | -6.33912552571625 |
| C | -3.04243082297177 | -0.89849239945105 | -4.96697032909507 |
| C | -3.71873179005497 | -0.19587302967294 | -5.96738574034521 |
| H | -1.86288136624971 | 2.67492669224346  | -5.97498671509641 |
| H | -1.38702283632764 | -0.88854308757006 | -3.57376394120496 |
| H | -3.83545198743728 | 1.65170144451615  | -7.09238286900376 |
| H | -3.38510051990606 | -1.88774202901873 | -4.66427747993427 |
| H | -4.59645769823978 | -0.63302892787653 | -6.44330300643491 |
| H | 7.02702619631661  | 2.37171208425073  | -5.36449121491731 |
| O | 6.27362534585329  | 2.08504136215863  | -4.79907889186946 |
| O | 5.10824796113298  | 2.95342516476651  | -6.49856781234729 |
| C | 5.13212373397391  | 2.38748948232734  | -5.39362020603029 |
| C | 3.90801395320322  | 1.98702795797670  | -4.61286047316192 |
| H | 4.21880010576787  | 1.49852914030955  | -3.68112955816493 |
| H | 3.38299296501717  | 1.23715120309400  | -5.22642949826705 |

|   |                   |                   |                    |
|---|-------------------|-------------------|--------------------|
| C | 2.99696183822062  | 3.19577298604036  | -4.32897124629436  |
| H | 2.81574377632167  | 3.76337184929903  | -5.24976967797703  |
| H | 3.50603106306025  | 3.87691259069415  | -3.63332763999357  |
| H | 1.78641271888806  | 2.20159360701592  | -2.80650774682394  |
| H | 1.14070566753334  | 3.73316154376293  | -3.37777095478834  |
| U | 1.40815537625315  | 1.72223004813782  | -8.08691661291257  |
| H | 2.17961355740098  | 3.02289694356495  | -10.85711302636832 |
| O | 0.21869882490740  | 2.88526689418866  | -8.71605904540023  |
| H | -0.72335981010347 | -0.47369263484636 | -8.37139083881667  |
| O | 2.68625616967593  | 0.59727870038701  | -7.55851959696693  |
| H | 0.96681416299632  | 0.02567565030690  | -10.79786527040002 |
| H | 3.89531383539118  | 3.25377788970354  | -7.17191861412236  |
| O | 2.47900338622003  | 2.23607338338672  | -10.36433202551445 |
| H | 3.43126717194429  | 2.14027169821690  | -10.55227864610113 |
| O | 1.05965652626561  | -0.18148570787615 | -9.84903181783431  |
| H | 1.66215304049081  | -0.94761640049157 | -9.79837914046677  |
| O | -0.44754082058404 | 0.12022490924066  | -7.64922248278774  |
| H | -1.25899357307497 | 0.42525939161123  | -7.17352377628350  |
| O | 2.97965952978087  | 3.43481482892601  | -7.69312784303731  |
| H | 2.87934428001621  | 4.38757572064737  | -7.86484372077179  |

#### **Uranyl-Ligand-5(b)**

|   |                   |                   |                   |
|---|-------------------|-------------------|-------------------|
| C | 0.16593427134692  | 3.13244083655227  | -4.78418364353161 |
| C | 0.04520720388527  | 1.61337527063369  | -4.78717283042064 |
| O | 0.29929189958441  | 0.97342754442660  | -5.85600513544715 |
| N | -0.32179990399086 | 0.95945463285863  | -3.68937188598442 |
| H | -0.58438046449493 | 1.50746222374738  | -2.86951604367586 |
| C | -0.42298115497412 | -0.47133041983117 | -3.60173084231033 |



|   |                   |                   |                    |
|---|-------------------|-------------------|--------------------|
| C | 0.66181060685260  | -1.27044355572775 | -3.99370055209275  |
| C | -1.59784003181160 | -1.03647080715547 | -3.10526630594762  |
| C | 0.54367474805072  | -2.65976539063010 | -3.90825985639782  |
| C | -1.69971479737839 | -2.42740439155291 | -3.02266249500062  |
| C | -0.63815977196486 | -3.23831000861383 | -3.43115035046302  |
| H | 1.60446310164130  | -0.80921733919702 | -4.29077377447663  |
| H | -2.42989223020087 | -0.40193034683088 | -2.79694881455348  |
| H | 1.39217254512754  | -3.29078393005930 | -4.17523155757193  |
| H | -2.61461394638373 | -2.87613476644408 | -2.63633263952269  |
| H | -0.72105053345604 | -4.32230684585573 | -3.35494379159423  |
| H | 1.44654629786515  | 6.66750122058334  | -8.37244779419340  |
| O | 1.49011790594085  | 5.83427604877326  | -8.88709721206704  |
| O | 1.21049092501990  | 3.66638344516327  | -8.72716217673429  |
| C | 1.18062349875670  | 4.77376218167065  | -8.16686075008179  |
| C | 0.80345065494121  | 4.91743416755514  | -6.70069026525757  |
| H | -0.07508554325885 | 5.57691649223316  | -6.61446931409500  |
| H | 1.63129337954834  | 5.40508581458304  | -6.16092239633622  |
| C | 0.53498125067917  | 3.50209137070425  | -6.21443414597651  |
| H | 1.46769337728671  | 2.94884592401291  | -6.42817709908048  |
| H | -0.28942555634160 | 3.12419729801740  | -6.84666287859439  |
| H | 0.93679938110402  | 3.43788245301183  | -4.05989129873625  |
| H | -0.78509091867128 | 3.58336267964118  | -4.46192427042912  |
| U | 0.79498021871485  | 1.14016895087950  | -8.16334469825077  |
| H | 0.50462058309946  | 1.81831525475984  | -11.24594767435780 |
| O | -0.93649823315374 | 1.27397783152766  | -8.52575343119959  |
| H | 1.08686463342666  | -1.95685943311638 | -7.58455146785853  |
| O | 2.54525742183800  | 1.06516089039650  | -7.89469082978611  |
| H | 0.20386677726684  | -1.27835074206222 | -10.17550913924832 |

|   |                  |                   |                    |
|---|------------------|-------------------|--------------------|
| O | 1.23965531136834 | 1.81156787433601  | -10.60414613773886 |
| H | 1.61194242765797 | 2.71773397162598  | -10.61797063460908 |
| O | 0.97024046313067 | -0.77782512410656 | -9.83879094223547  |
| H | 1.62314582885063 | -0.72663027014727 | -10.56249057419756 |
| O | 0.56146076065260 | -1.20120386119846 | -7.26653704233831  |
| H | 0.40303747044401 | -1.32078214916450 | -6.30216873660582  |
